# Supplementary material
Source: PubMed Central journal article supplement (PMC6727256)
Supplement: ASN.2018121244SupplementaryData.pdf [file ASN.2018121244SupplementaryData.pdf]

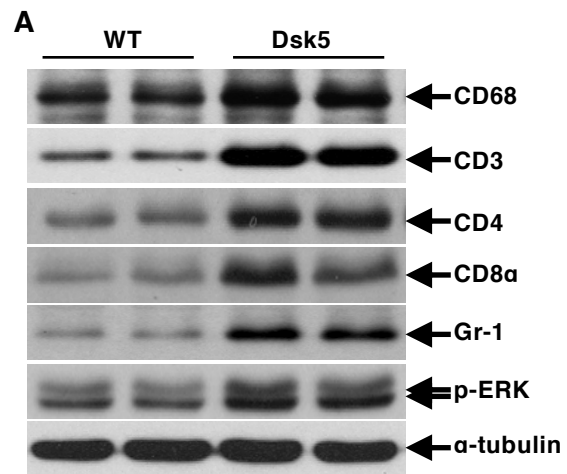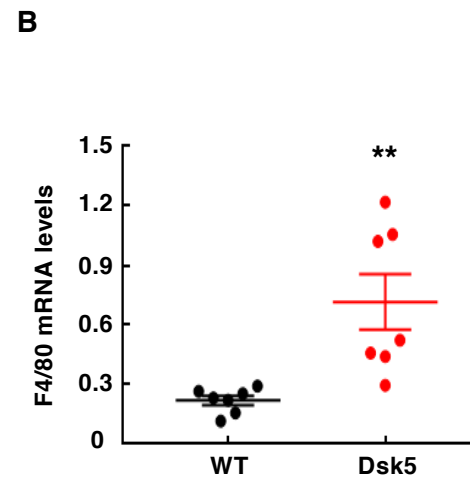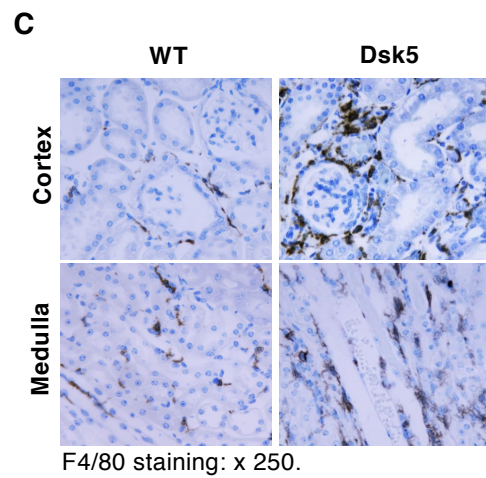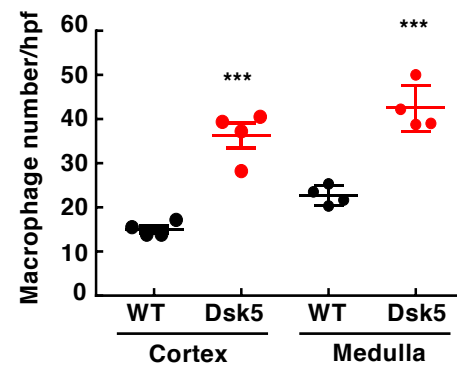

Supplementary Figure S1

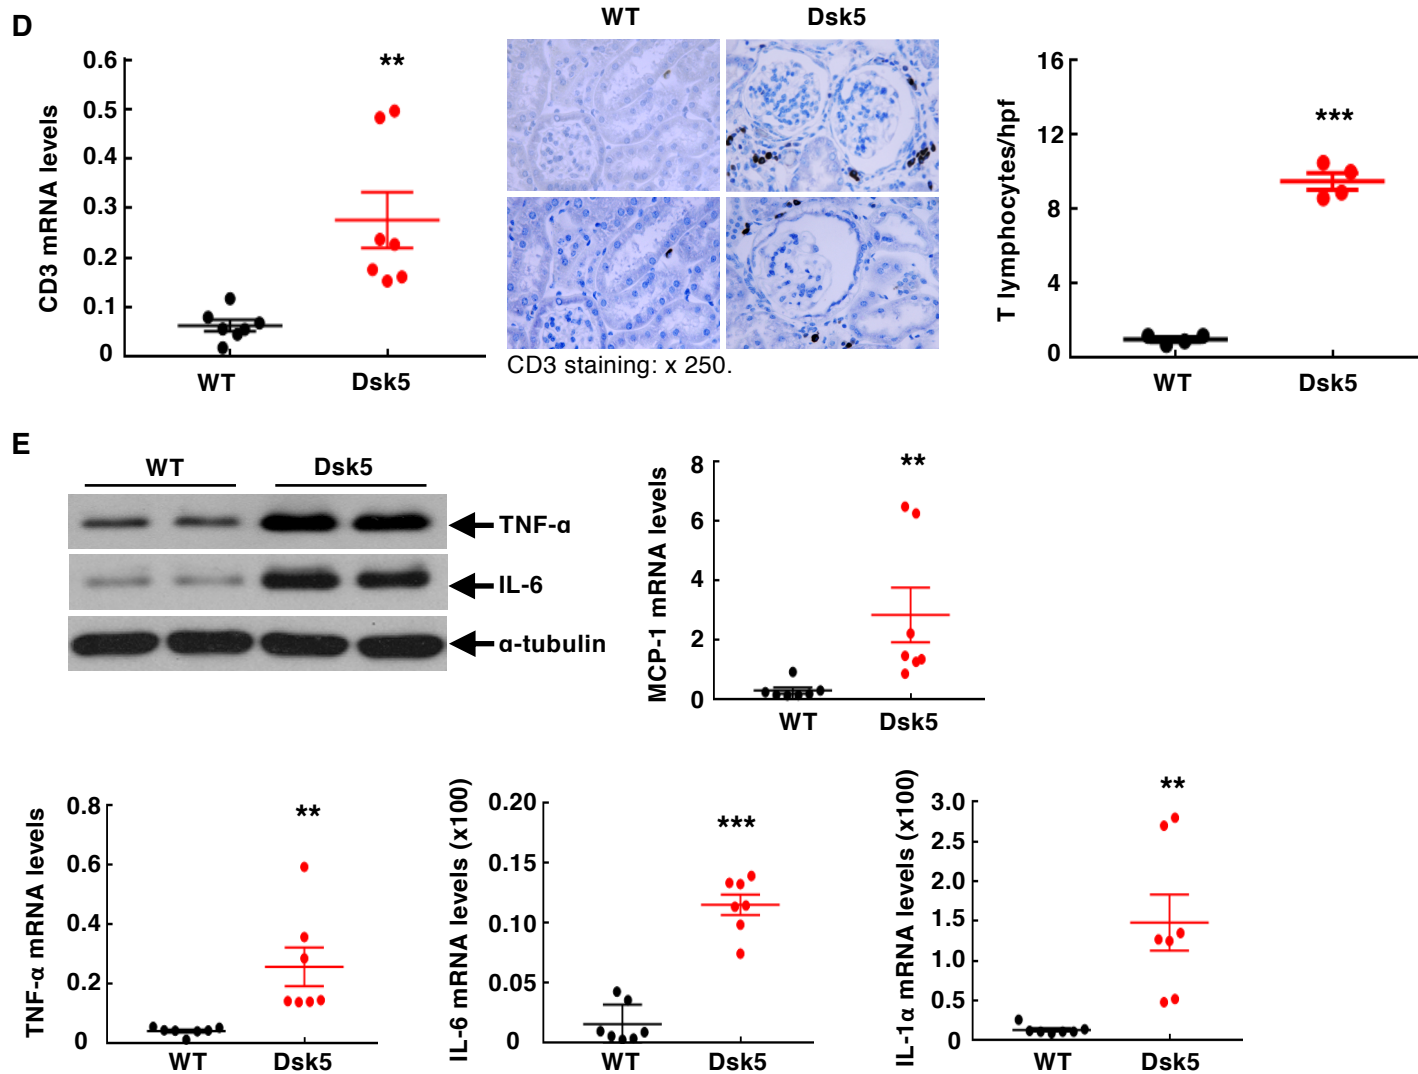

Supplementary Figure S1

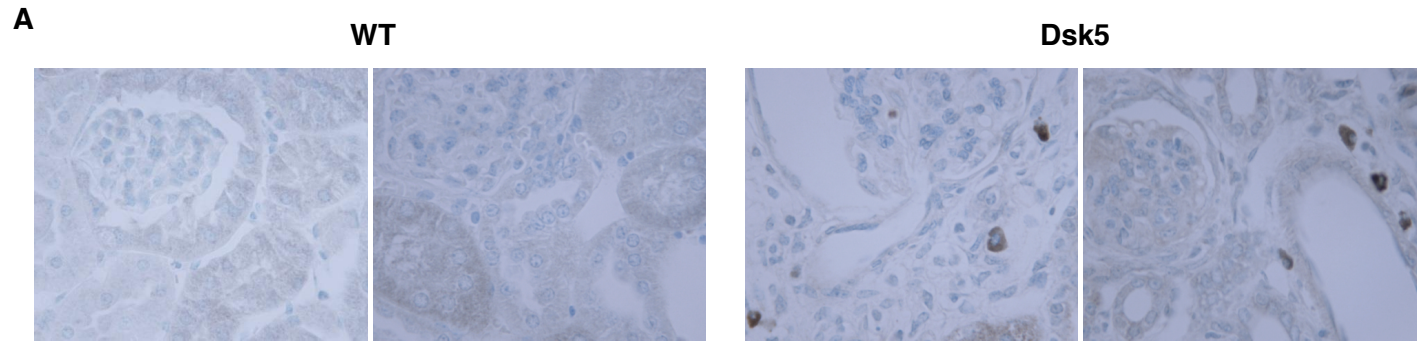

Gr-1 staining, a neutrophil marker: x 400.

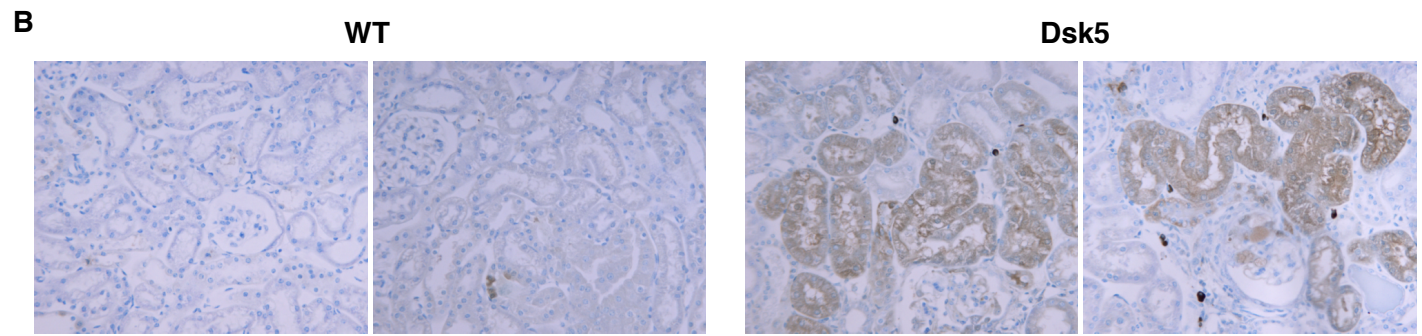

4-HNE staining, a marker of oxidative stress (lipid peroxidation) : x 160.

## Supplemental Figure 2

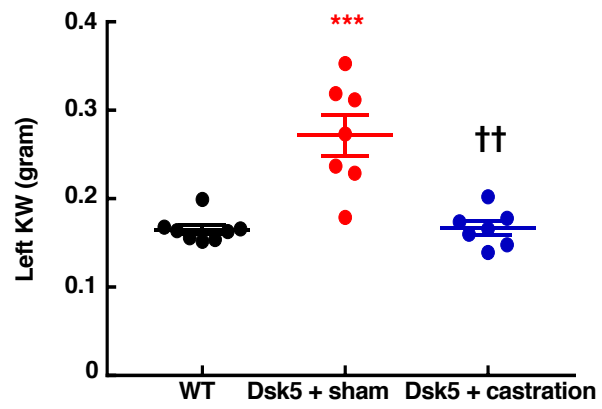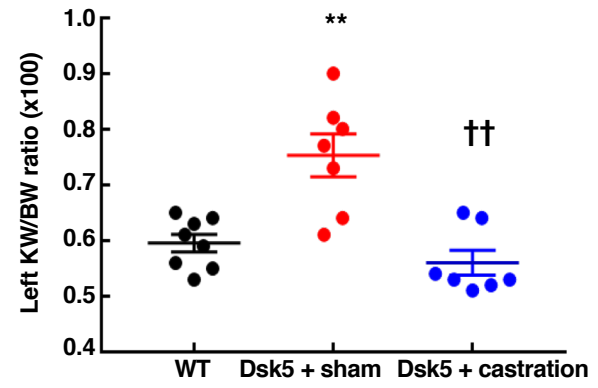

Supplemental Figure S3

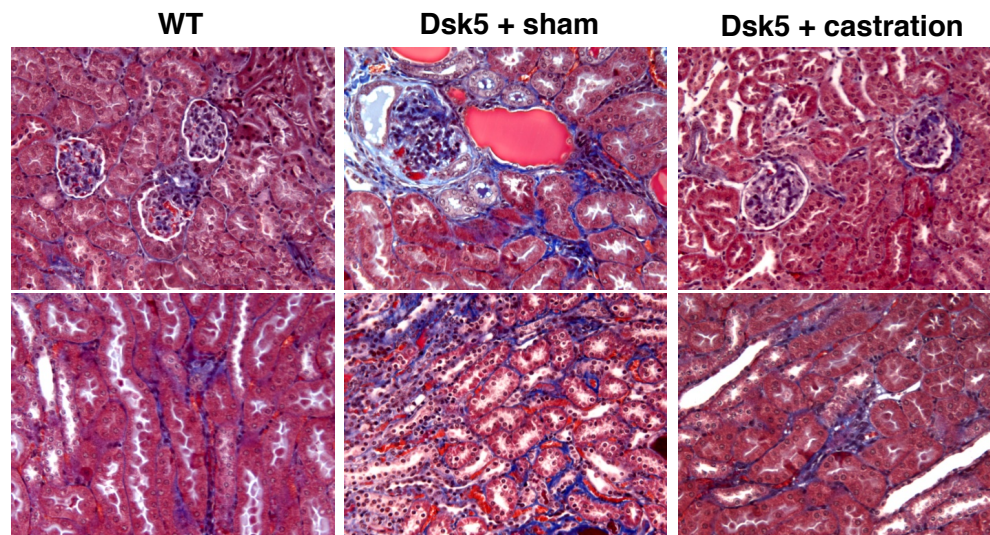

Masson's trichrome staining: X160.

**Supplementary Figure S4**

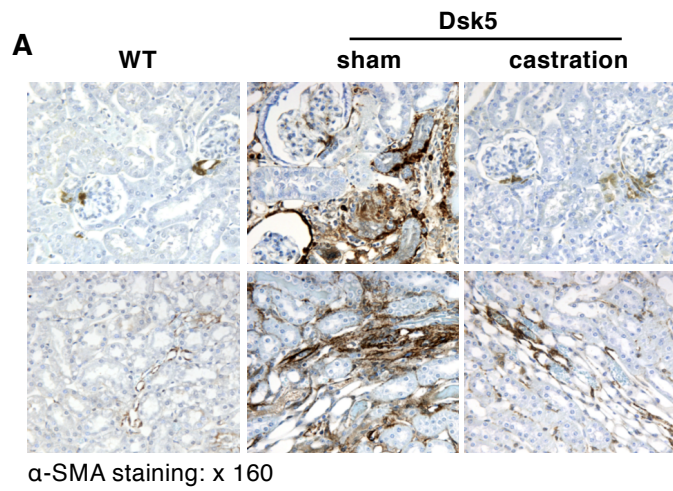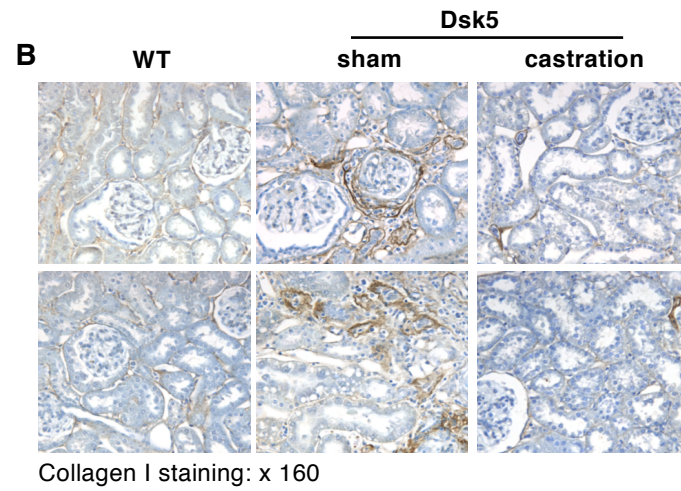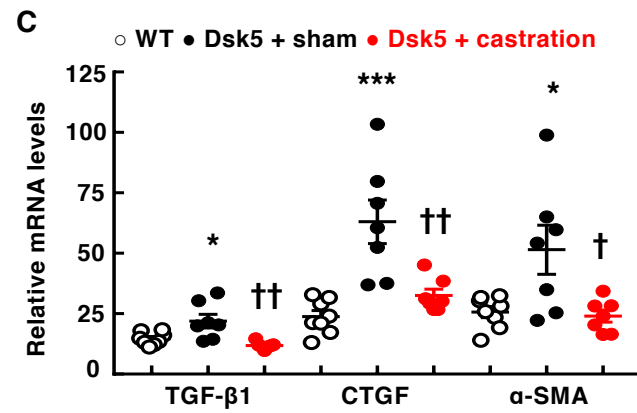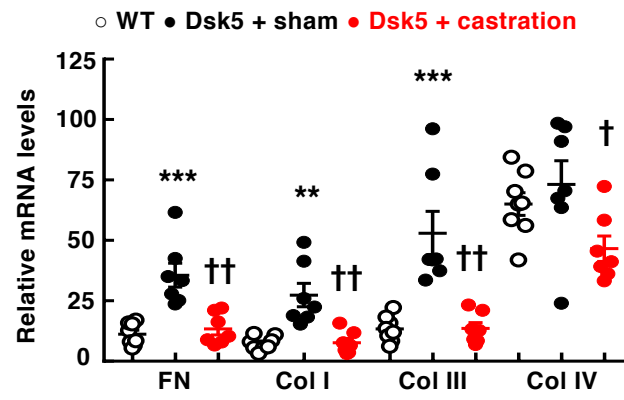

Supplementary Figure S5

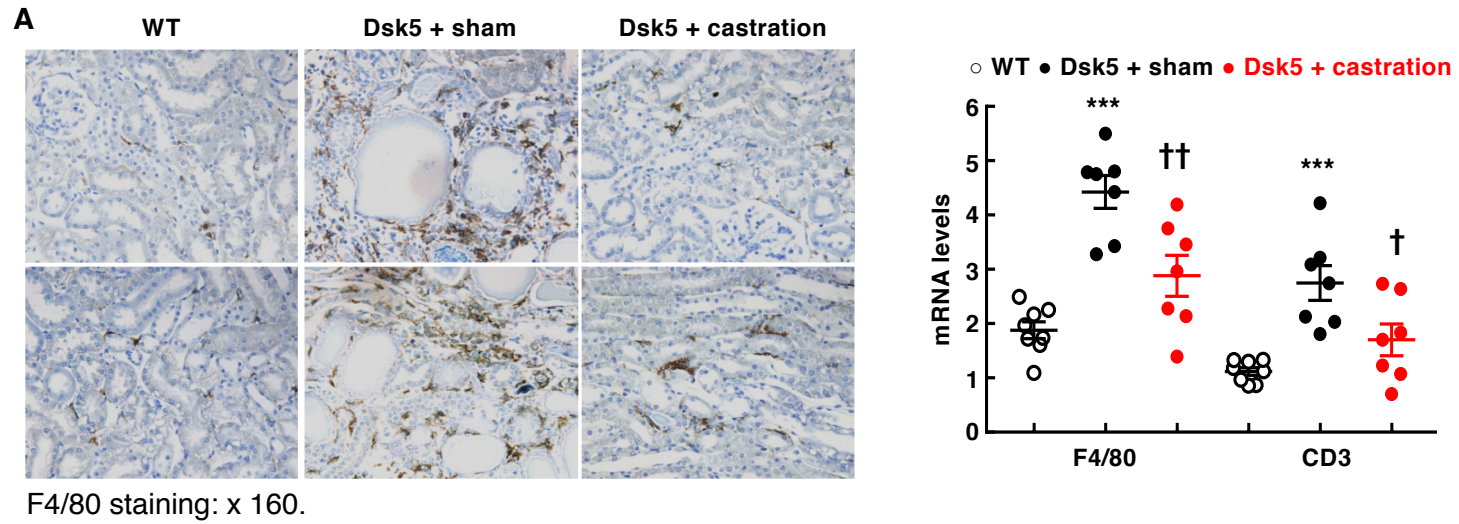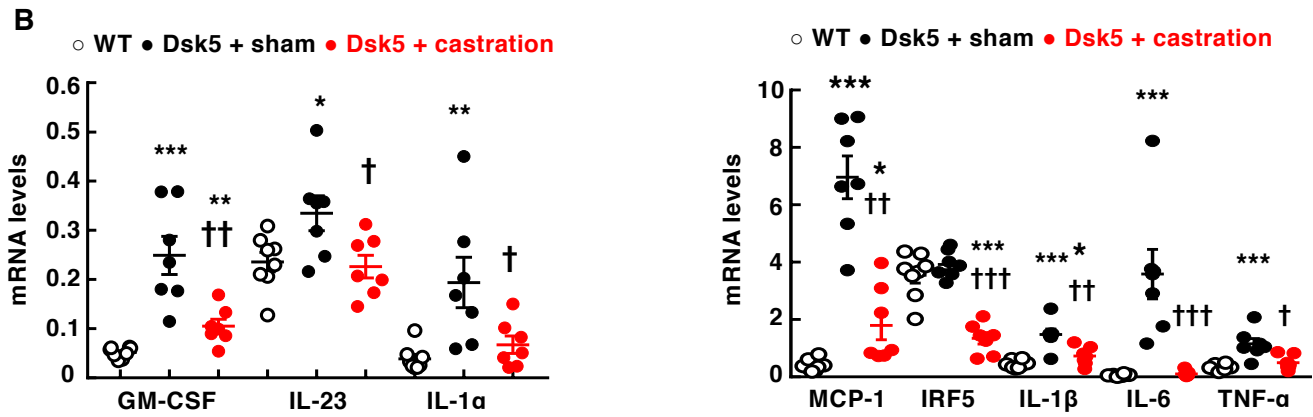

Supplementary Figure S6

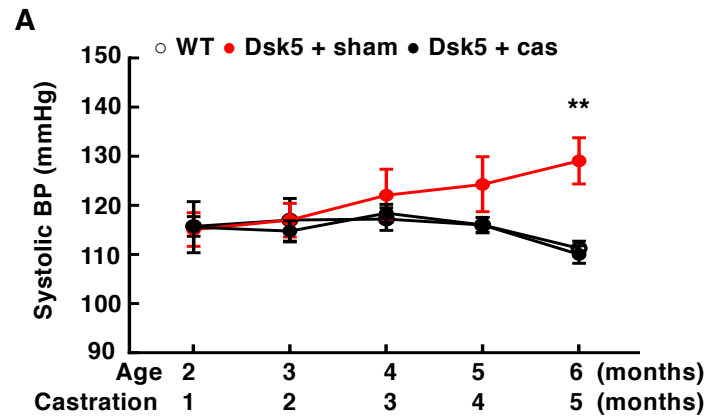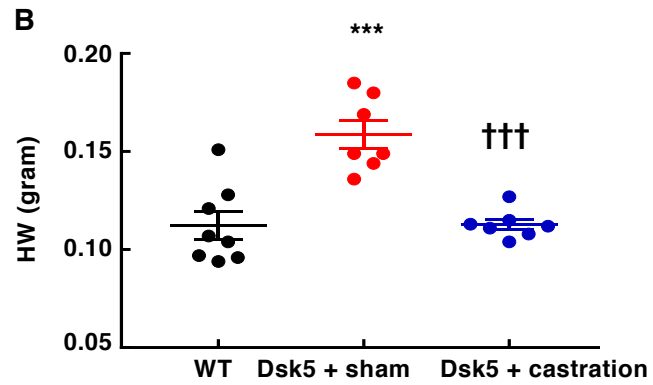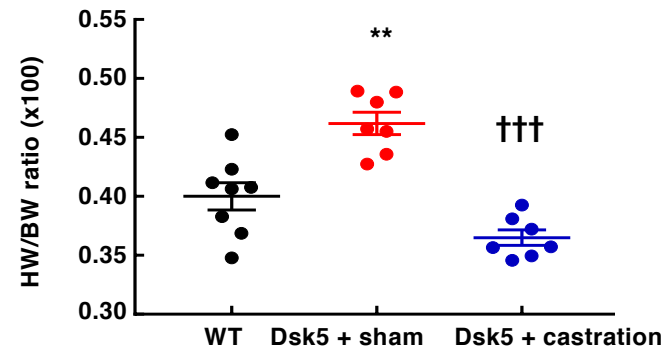

Supplemental Figure S7



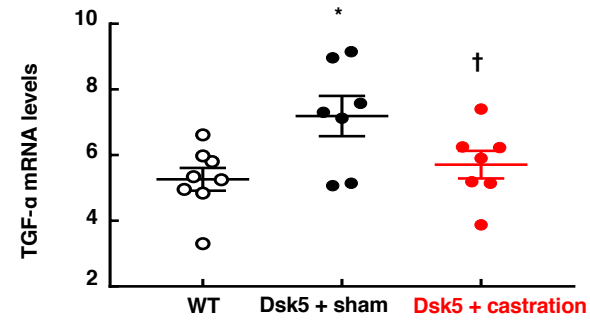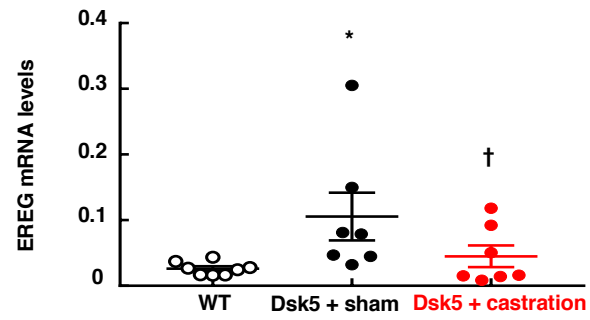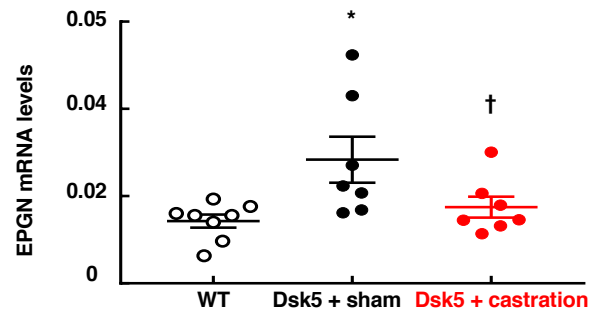

Supplementary Figure S8

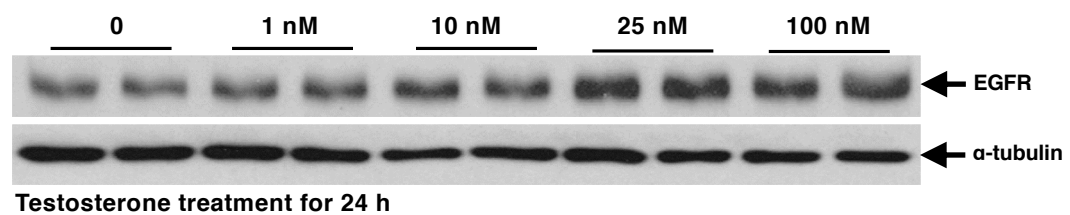

**Supplemental Figure S9**

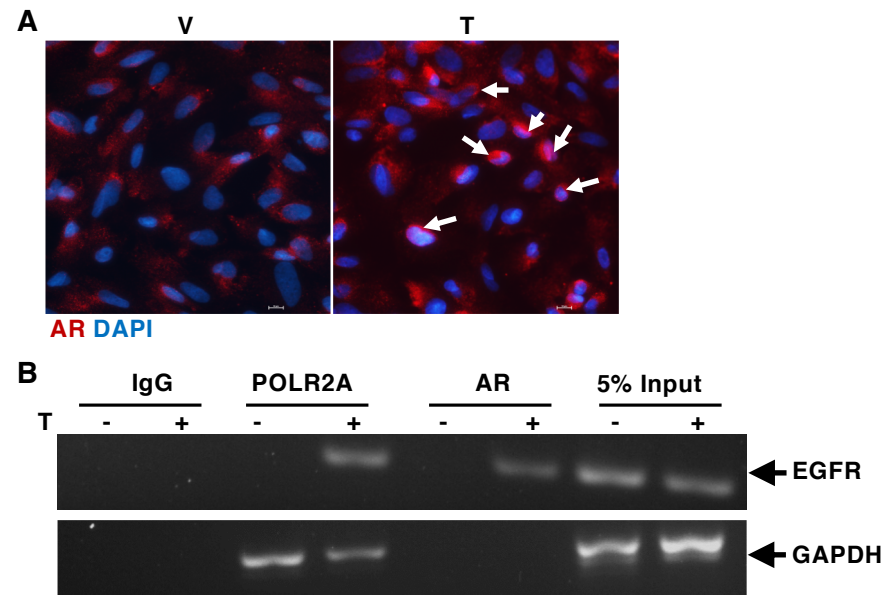

Supplemental Figure S10

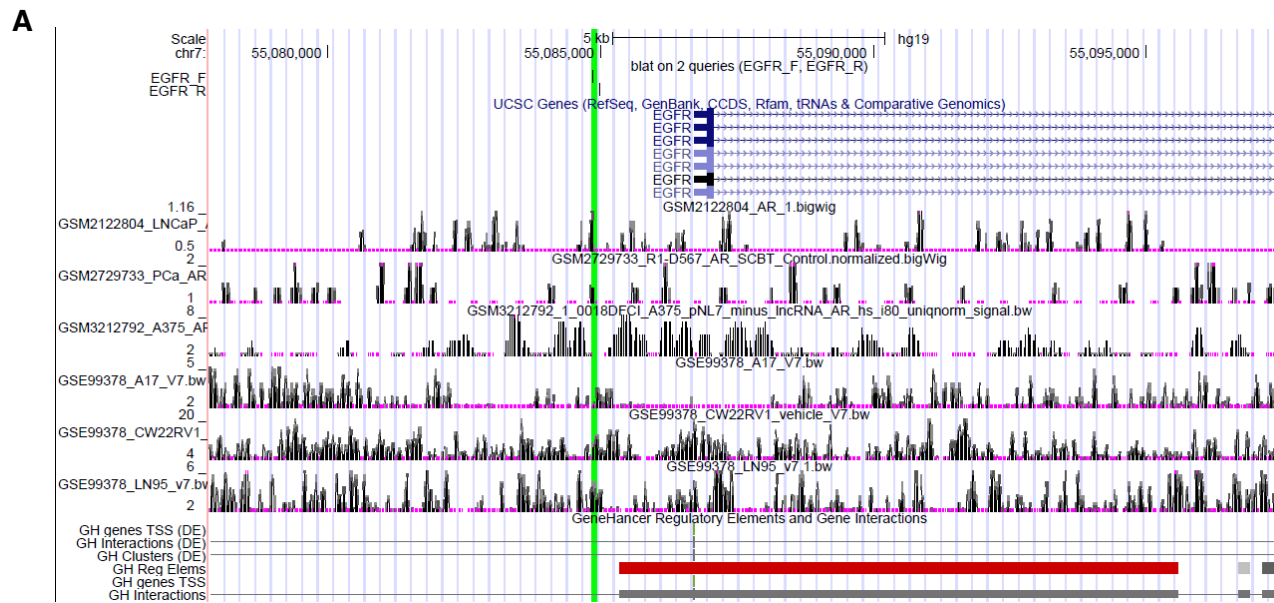

**B** Androgen Receptor Matrix

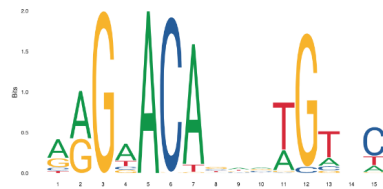

**C**

| Motif ID | Alt ID | Sequence Name | Strand | Start | End  | p-value  | q-value | Matched Sequence |
|----------|--------|---------------|--------|-------|------|----------|---------|------------------|
| MA0007.2 | AR     | FP011054      | -      | 1978  | 1992 | 6.75e-06 | 0.067   | AAGAACAATAAGTAC  |

**Supplemental Figure S11**

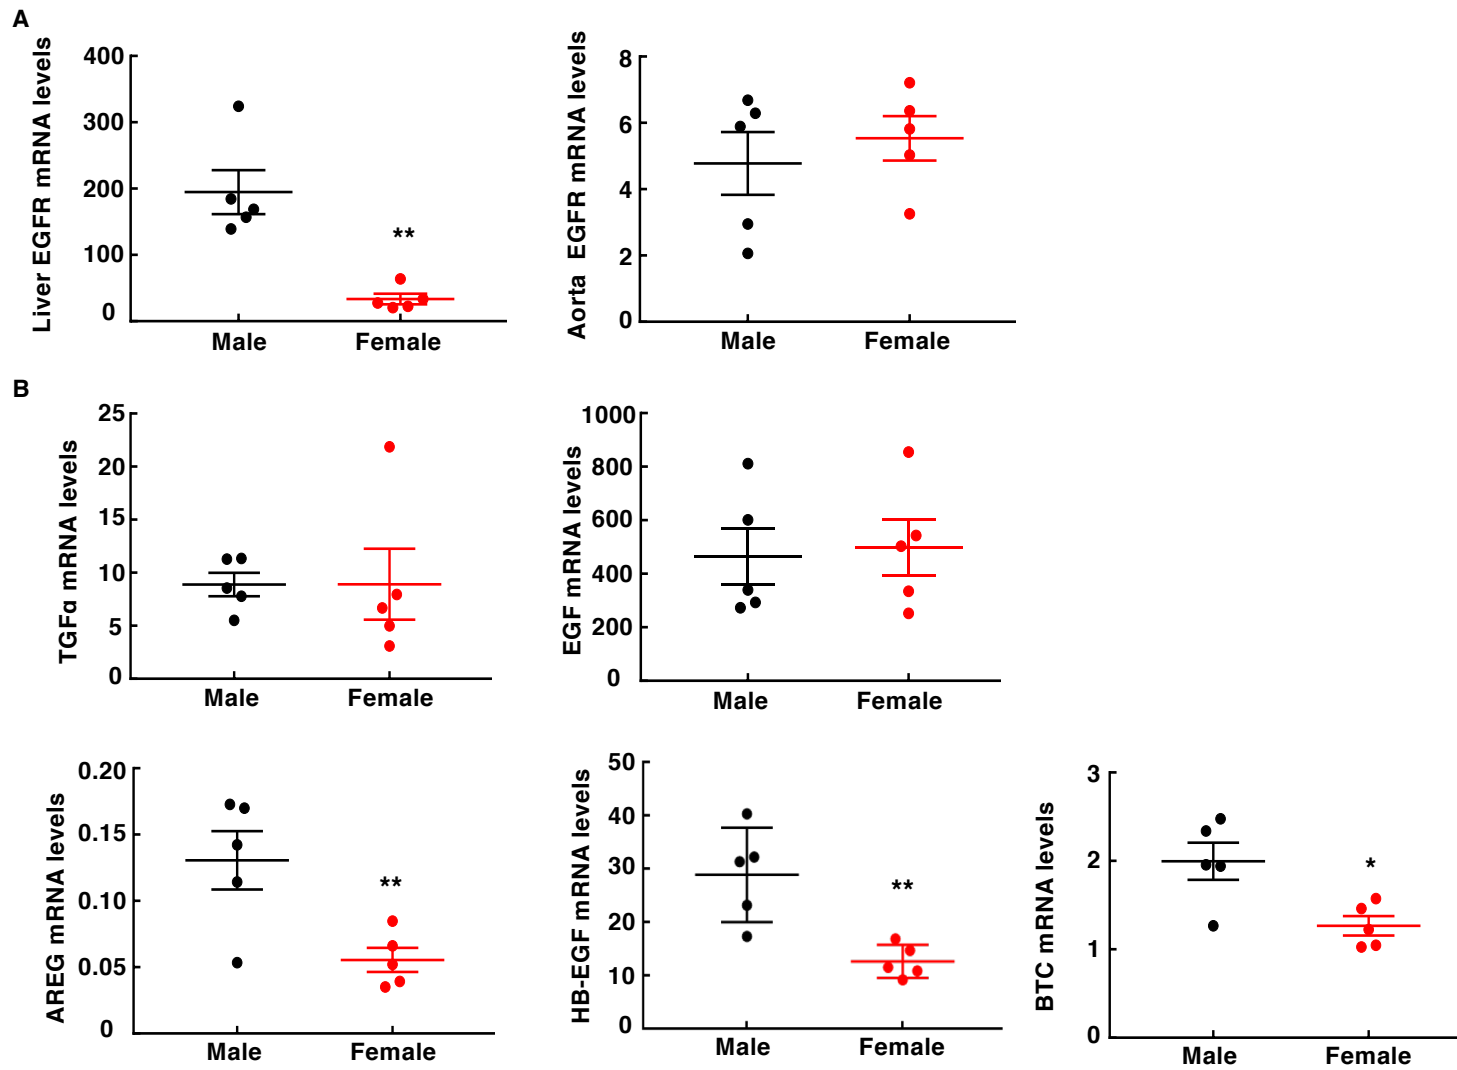

Supplemental Figure S12

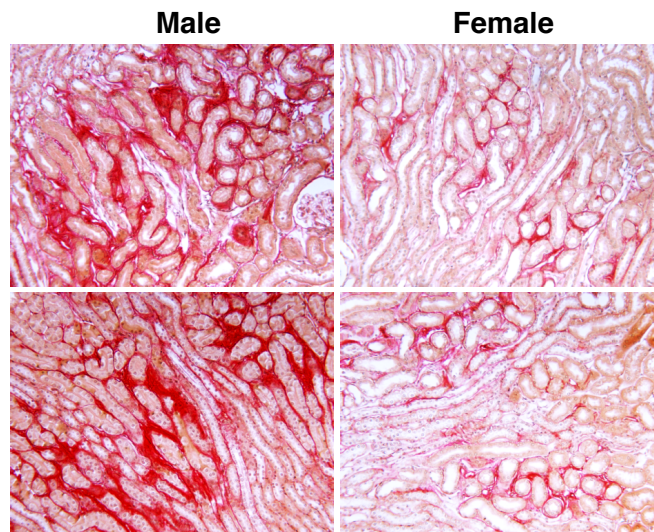

Sirius red staining: x 100.

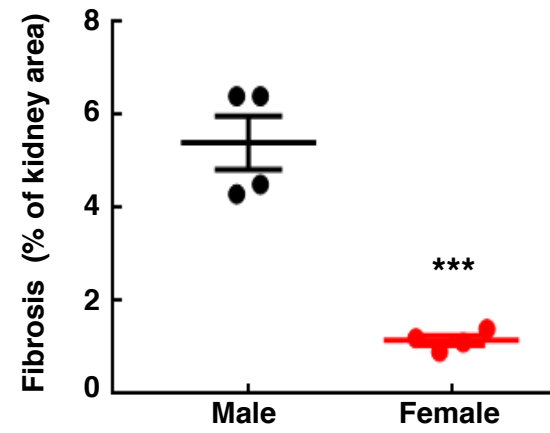

Supplemental Figure S13
